# Supplementary material
Source: Springer Nature journal article supplement (https://www.springermedizin.de/resource/supplementary/13014_2012_614_MOESM6_ESM.pdf/9634162)
Supplement: MOESM6 [file 9634162]

Color scale for Pearson correlation coefficients:

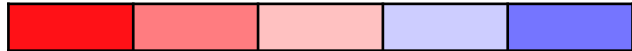

1.0 - 0.8   0.8 - 0.6   0.6 - 0.4   0.4 - 0.2   0.2 - 0.0

### A Semi-quantitative analysis:

| Parameter  | VS | VD | VF | PF | DHV | NF | HF | AHS |
|------------|----|----|----|----|-----|----|----|-----|
| AUC 1 min  | —  | ⊕  | ⊕  | ⊕  | ⊖   | ⊖  | +  | ⊕   |
| AUC 2 min  | —  | ⊕  | ⊕  | ⊕  | ⊖   | ⊖  | +  | ⊕   |
| AUC 3 min  | —  | ⊕  | ⊕  | ⊕  | ⊖   | —  | +  | ⊕   |
| AUC 4 min  | —  | ⊕  | ⊕  | ⊕  | ⊖   | —  | +  | ⊕   |
| AUC 5 min  | —  | ⊕  | ⊕  | ⊕  | ⊖   | —  | +  | ⊕   |
| AUC 10 min | —  | ⊕  | ⊕  | +  | ⊖   | —  | +  | ⊕   |
| AUC 15 min | —  | ⊕  | ⊕  | +  | —   | —  | +  | +   |
| AUC 20 min | —  | ⊕  | ⊕  | +  | —   | —  | +  | +   |

### B Tofts kinetic analysis:

| Parameter          | VS | VD | VF | PF | DHV | NF | HF | AHS |
|--------------------|----|----|----|----|-----|----|----|-----|
| $k^{\text{trans}}$ | ⊖  | ⊕  | +  | +  | ⊖   | ⊖  | +  | +   |
| $k_{\text{ep}}$    | ⊖  | ⊕  | ⊕  | ⊕  | ⊖   | ⊖  | —  | ⊕   |
| $V_e$              | —  | +  | +  | +  | —   | —  | +  | +   |
| Unfit fraction     | ⊕  | ⊖  | ⊖  | ⊖  | ⊕   | ⊕  | —  | —   |
